# Supplementary material
Source: publisher site journal article supplement (https://www.dovepress.com/article/468935)
Supplement: Supplementary file 1 [file get_supplementary_file.php]

**Figure S1** In vitro cytotoxicity assay of HeyA8 cells treated with (A) OLA:RAPA=1:1, (B) OLA:RAPA=1:2, (C) OLA:RAPA=1:4, (D) OLA:RAPA=1:11, (E) OLA:RAPA=2:1, (F) OLA:RAPA=2:3, (G) OLA:RAPA=4:1, and (H) OLA:RAPA=11:1.

**Abbreviations:** OLA, olaparib; RAPA, rapamycin.


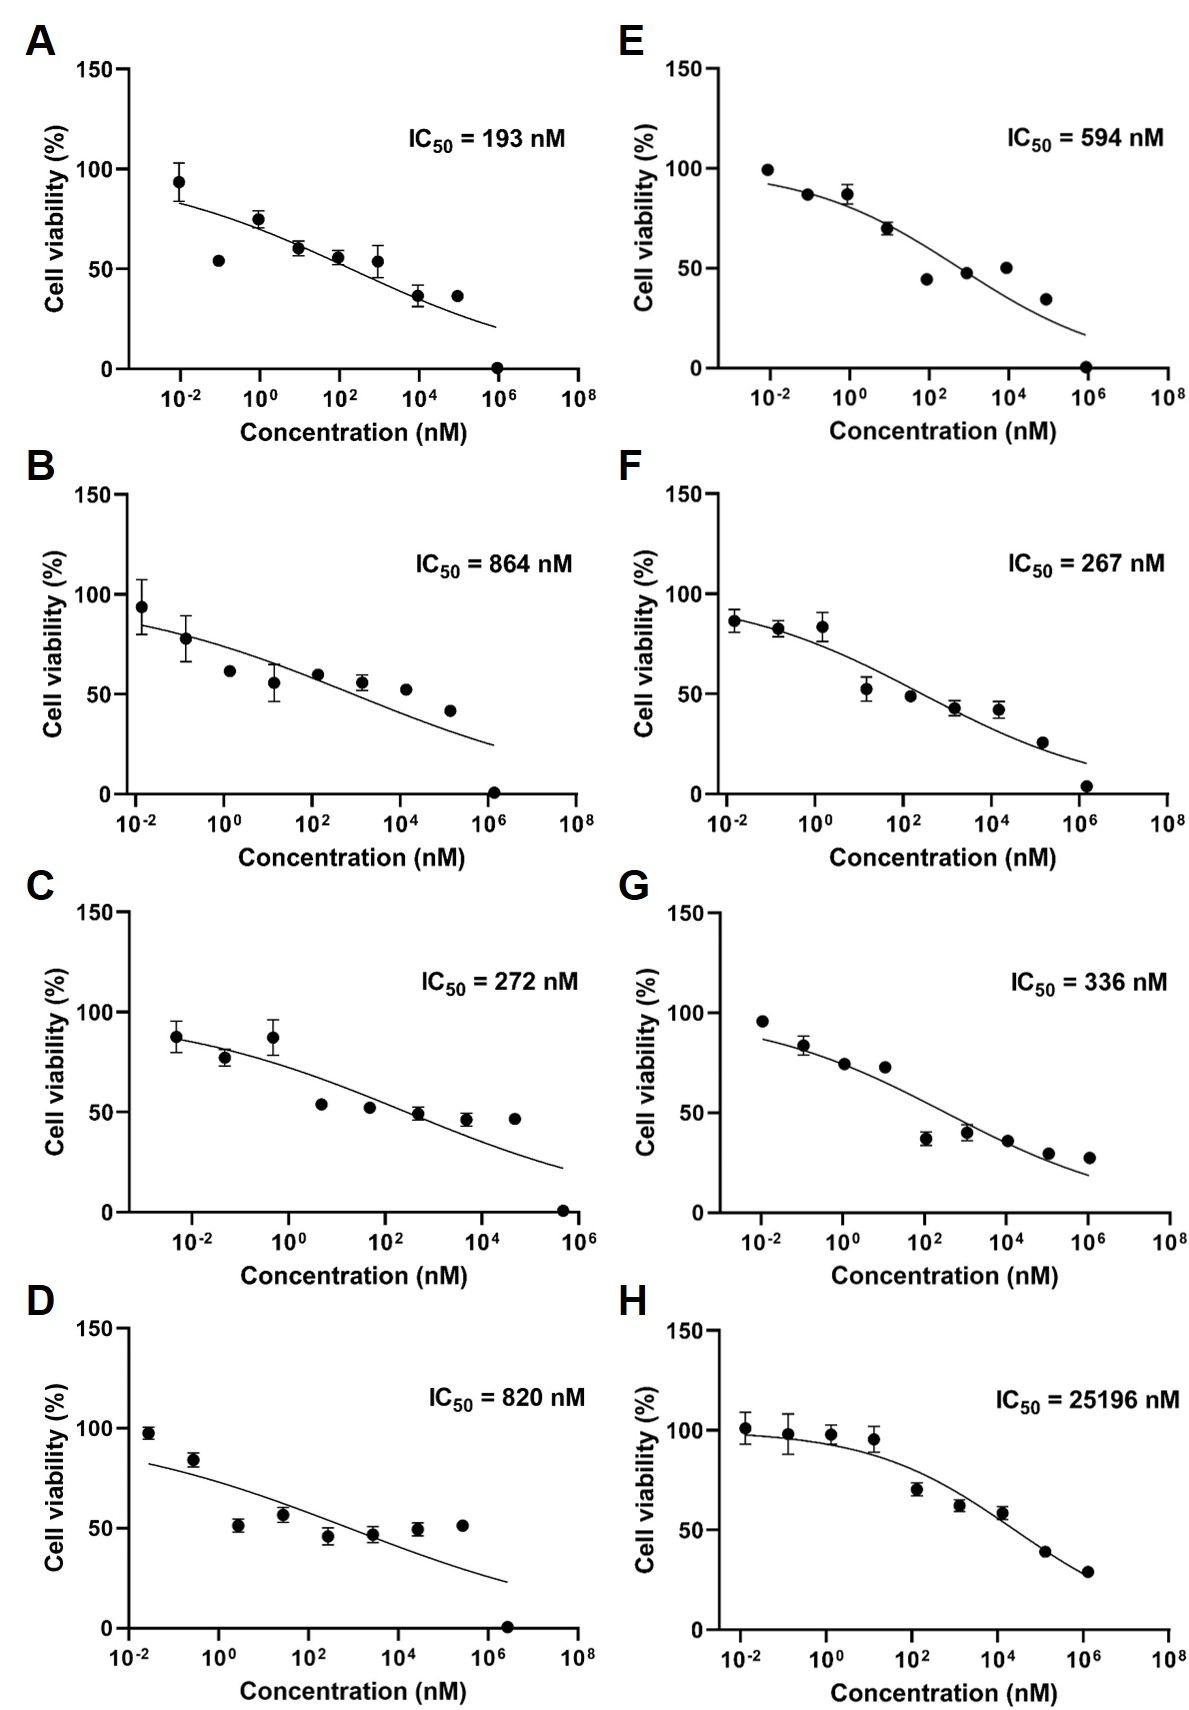


**Figure S2** CI value of OLA and RAPA at various molar ratios based on OLA.

**Abbreviations:** CI, combination index; OLA, olaparib; RAPA, rapamycin.


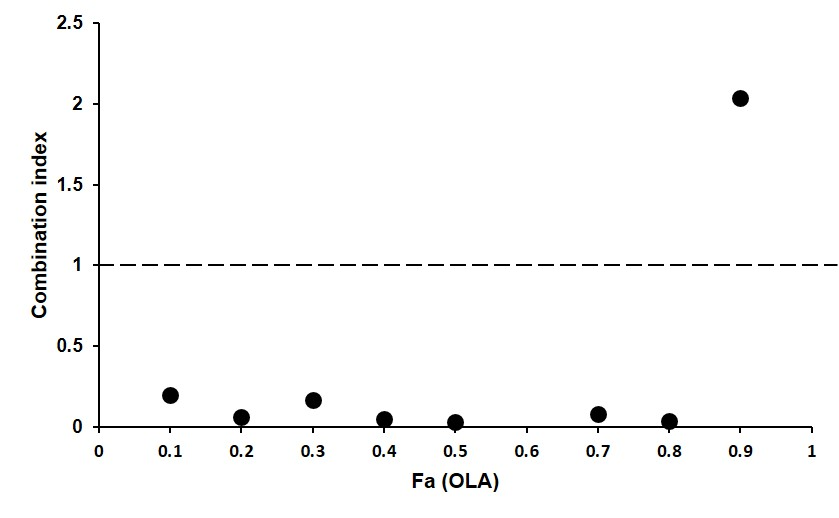


**Figure S3** OLA/RAPA-TPGS and OLA/RAPA-SOL drug release profiles of OLA and RAPA in micelles. (A) OLA and RAPA release in TPGS and (B) OLA and RAPA release in SOL (n=3).


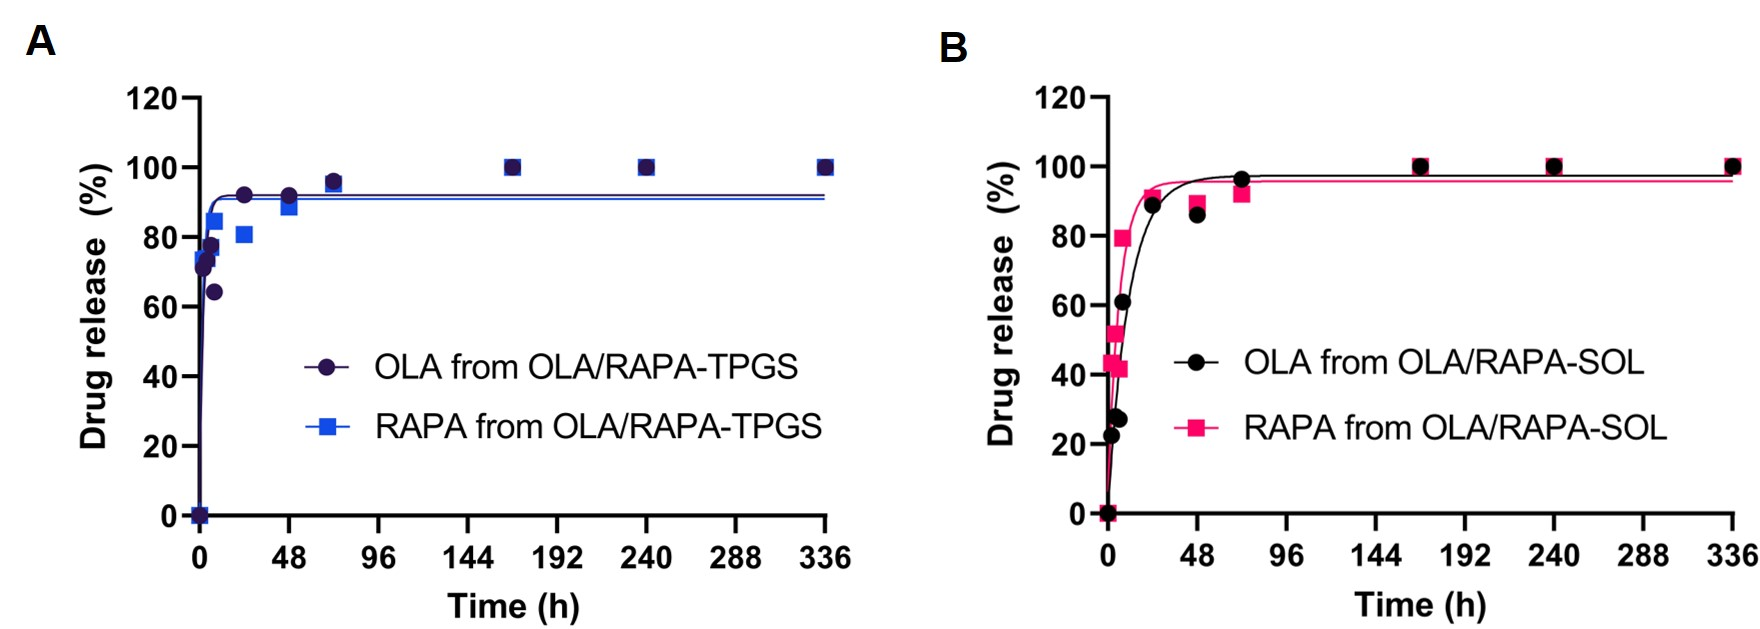


**Figure S4** Representative morphology change of HeyA8 cell tumor spheroids in 2 weeks.


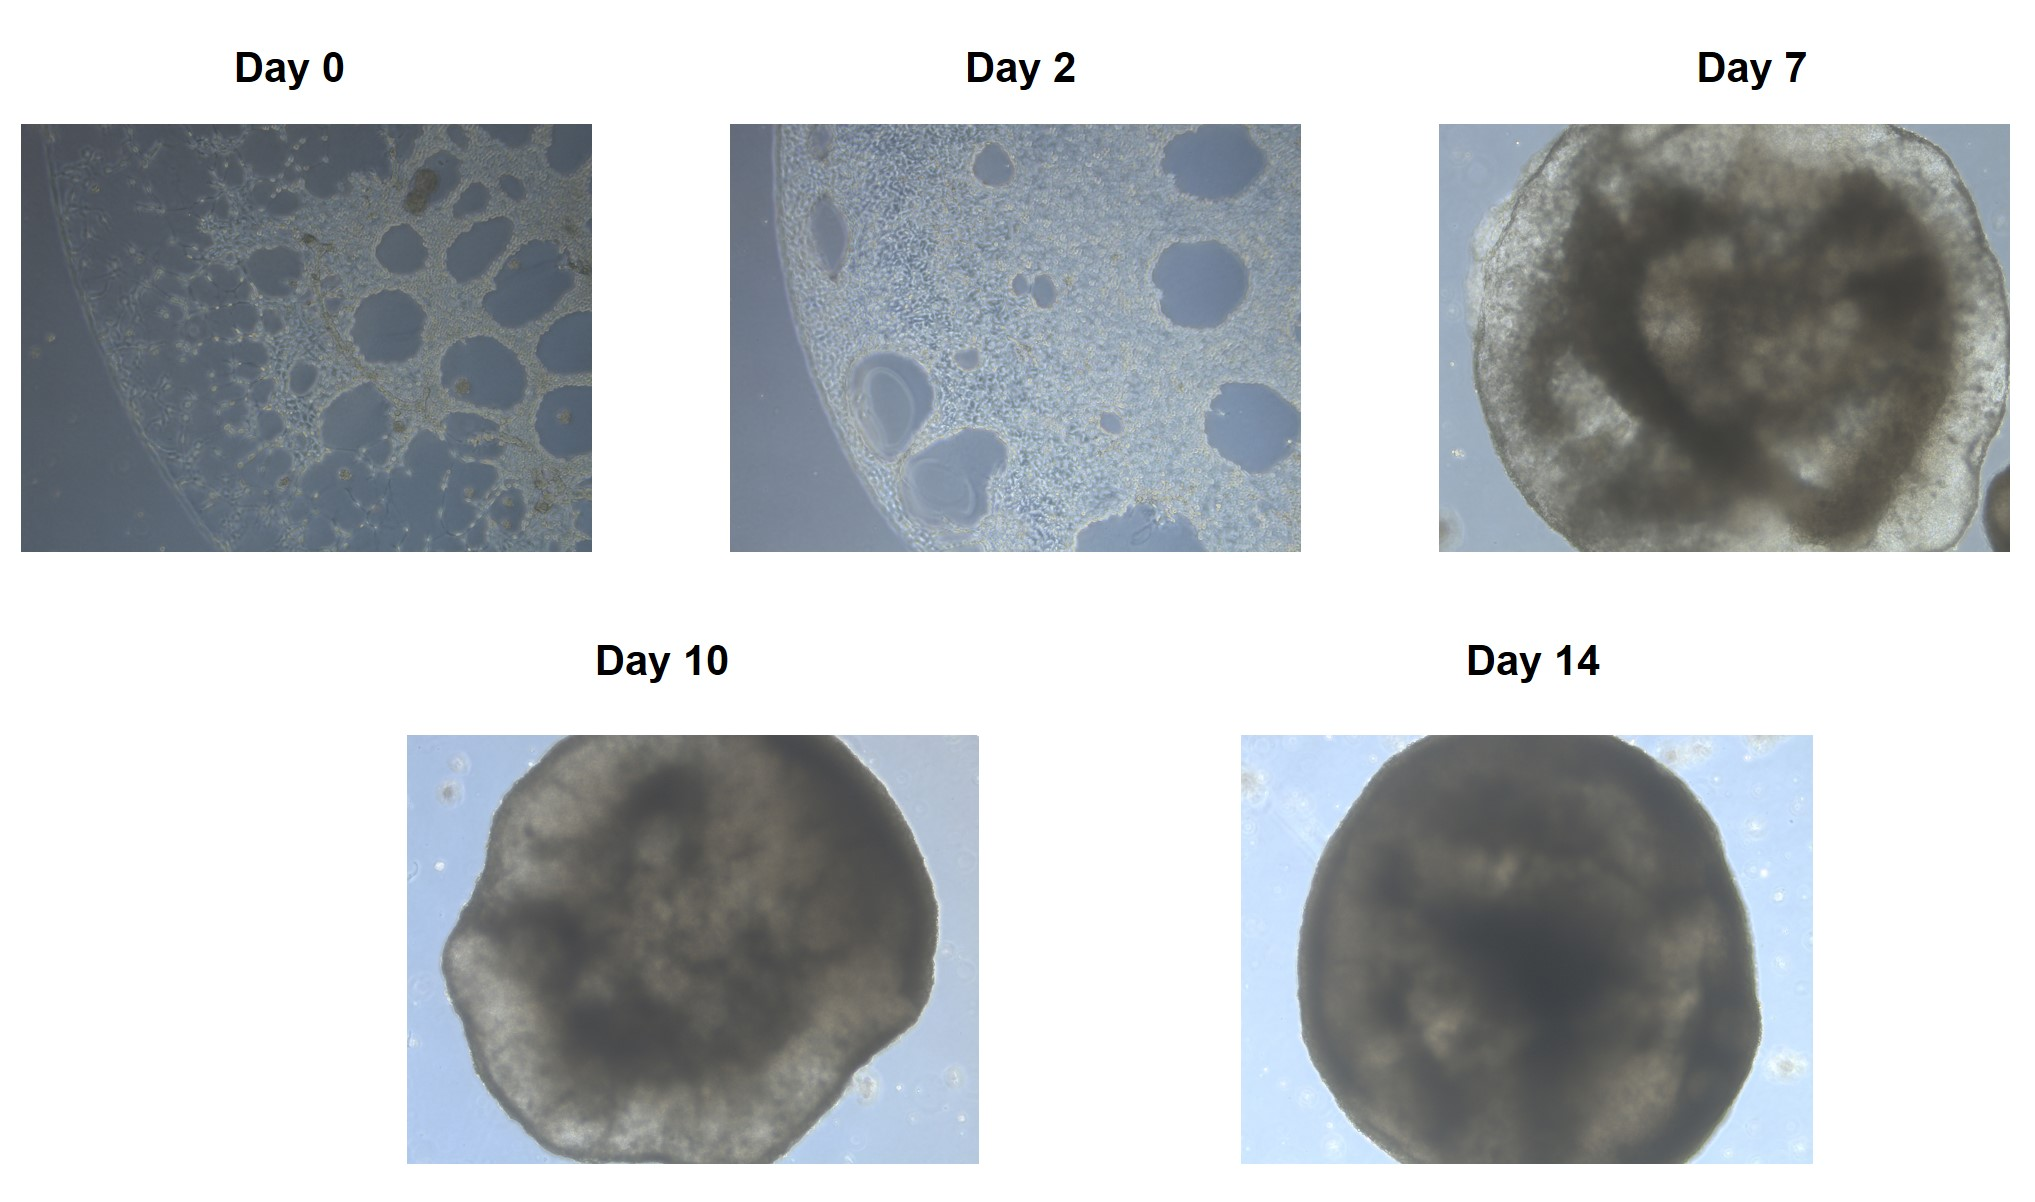


**Figure S5** Image of a mouse at day 14 after evaluating anticancer efficacy in a HeyA8 cell xenograft model.


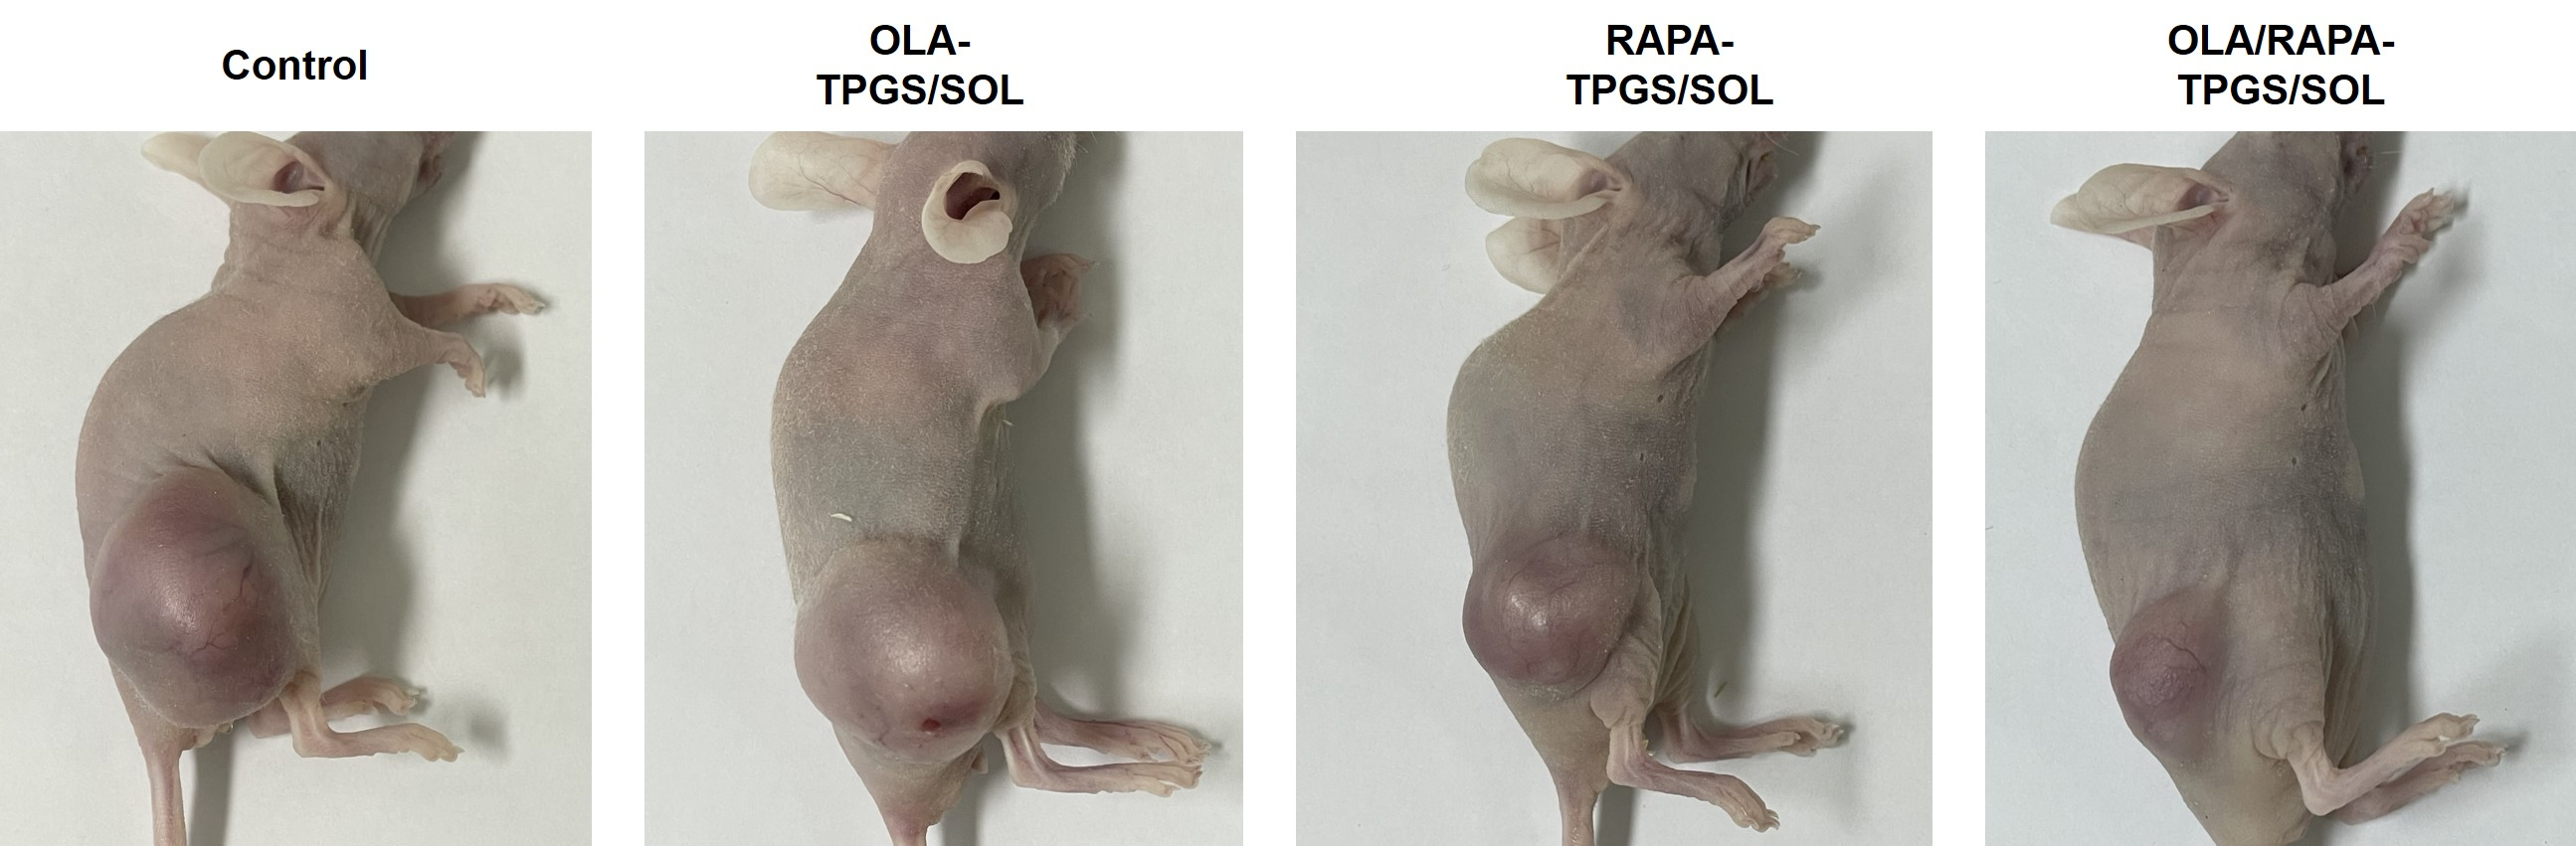


**Figure S6** Anticancer efficacy in a HeyA8 cell intraperitoneal xenograft model based on (A) tumor weight and (B) body weight.


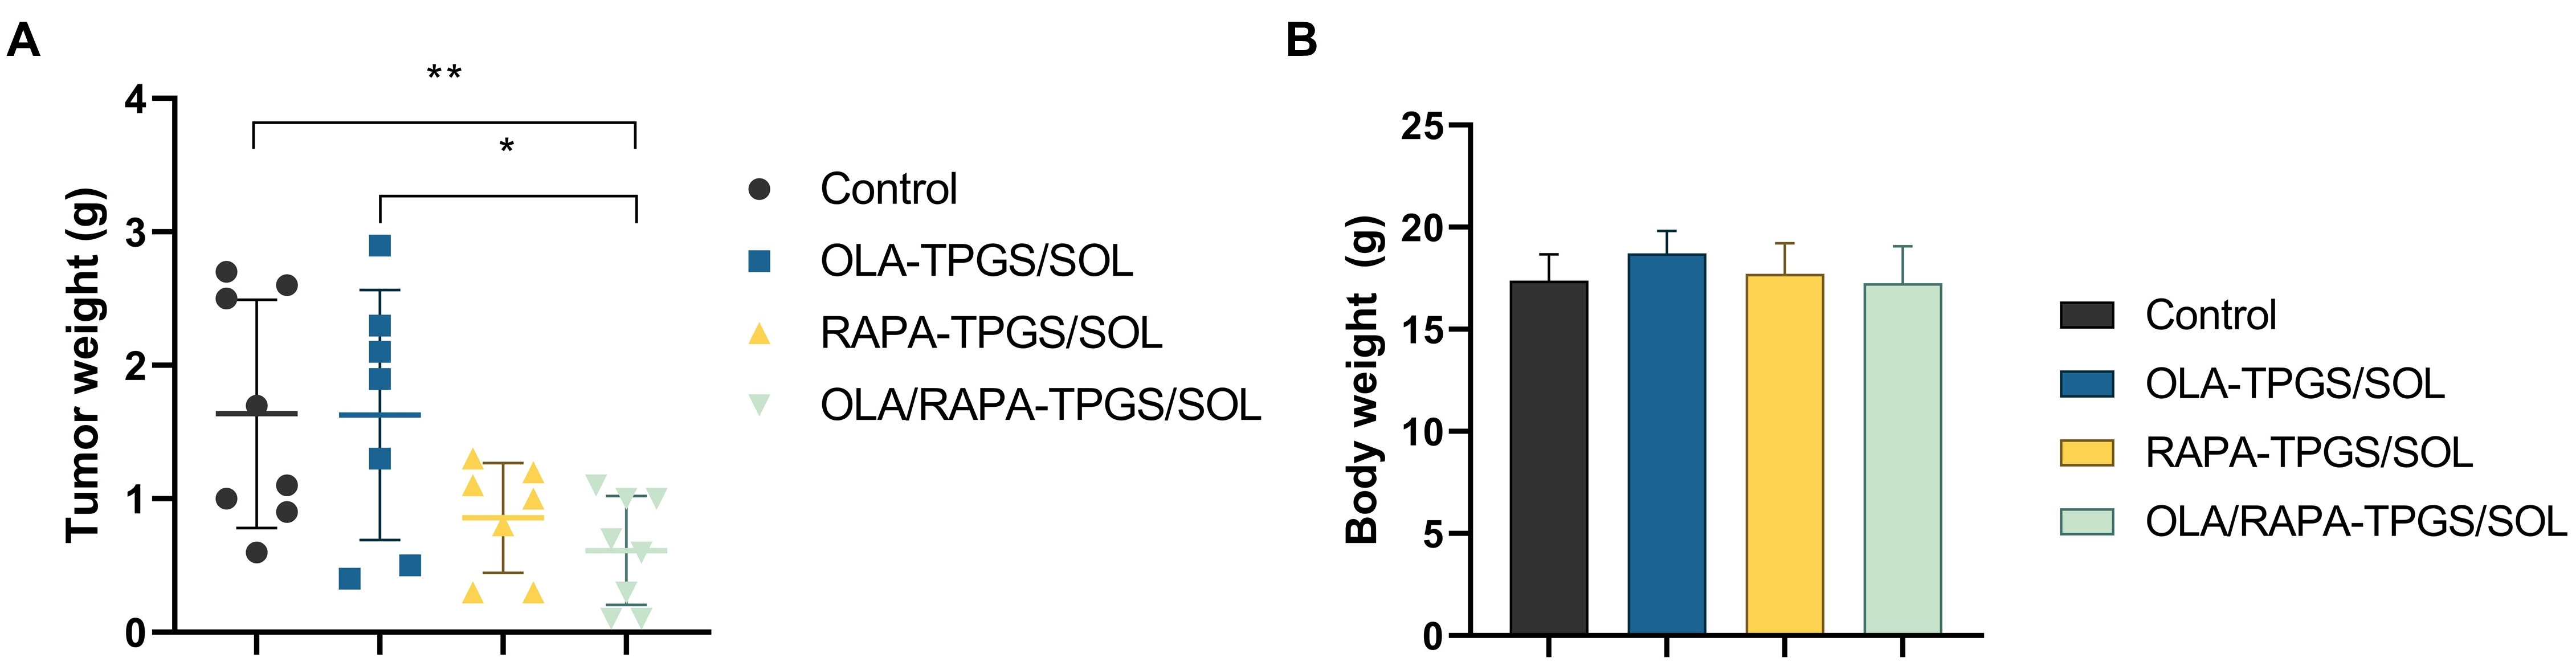


**Table S1** Physicochemical properties of freeze-drying formulation after rotary evaporation

**Abbreviations:** OLA, olaparib; RAPA, rapamycin.

| **Method** | **Encapsulation efficiency (EE %)** | | **Size (nm)** | **PolyDispersity Index (PDI)** | **Zeta Potential (mV)** |
| --- | --- | --- | --- | --- | --- |
| **OLA** | **RAPA** |
| Rotary evaporator | 66.1 ± 5.95 | 77.5 ± 5.09 | 13.4 ± 3.04 | 0.18 ± 0.06 | -5.60 ± 1.02 |
| Freeze-drying after rotary evaporator | 75.1 ± 3.56 | 86.4 ± 9.43 | 13.1 ± 3.91 | 0.14 ± 0.03 | -2.00 ± 2.69 |
